# Supplementary material for: PACS-2 deficiency in tubular cells aggravates lipid-related kidney injury in diabetic kidney disease
Source: Mol Med. 2022 Sep 23;28:117. doi: 10.1186/s10020-022-00545-x (PMC9502582; doi:10.1186/s10020-022-00545-x)
Supplement: Supplementary file 2 — Additional file 2: Table S1. The sequences of primer pairs. [file 10020_2022_545_MOESM2_ESM.xlsx]

## Sheet: Sheet1
Table S1: The sequences of primer pairs
Gene name	Species	Primer sequence (5'-3')
Srebf1	Mus musculus	F	CAAGGCCATCGACTACATCCG
		R	CACCACTTCGGGTTTCATGC
Acaca	Mus musculus	F	ATGGGCGGAATGGTCTCTTTC
		R	TGGGGACCTTGTCTTCATCAT
Fasn	Mus musculus	F	GGCTCTATGGATTACCCAAGC
		R	CCAGTGTTCGTTCCTCGGA
Srebf2	Mus musculus	F	GTTGACCACGCTGAAGACAGA
		R	CACCAGGGTTGGCACTTGAA
Abca1	Mus musculus	F	GCTTGTTGGCCTCAGTTAAGG
		R	GTAGCTCAGGCGTACAGAGAT
LdlR	Mus musculus	F	TCAGACGAACAAGGCTGTCC
		R	CCATCTAGGCAATCTCGGTCTC
Hmgcr	Mus musculus	F	AGAGCGAGTGCATTAGCAAAG
		R	GATTGCCATTCCACGAGCTAT
Ppara	Mus musculus	F	TGCAAACTTGGACTTGAACG
		R	GATCAGCATCCCGTCTTTGT
Soat1	Mus musculus	F	GAAGGCTCACTCATTTGTCAGA
		R	GTCTCGGTAAATAAGTGTAGGCG
SREBF1	Homo sapiens	F	ACTTCCCTGGCCTATTTGACC
		R	GGCATGGACGGGTACATCTT
ACACA	Homo sapiens	F	ATTTCTTCCATCTCCCCCTCT
		R	ATGCCAATCTCATTTCCTCCT
FASN	Homo sapiens	F	CTGGCTACCTGAGCATAGTGTG
		R	ACTGGTACACCTTCCCACTCAC
SREBF2	Homo sapiens	F	GCAGTCTGGTGGACAATGAGG
		R	TCATCCAATAGAGGGCTTCC
ABCA1	Homo sapiens	F	TGCCAGAGTTATTAGTGCCAAGT
		R	GGGAATCAAAGCAGGATGTTAG
LDLR	Homo sapiens	F	ACGGCGTCTCTTCCTATGACA
		R	CCCTTGGTATCCGCAACAGA
HMGCR	Homo sapiens	F	AGGACCCCTTTGCTTAGATGA
		R	GCACCTCCACCAAGACCTATT
